# Supplementary material for: Emissions of intermediate-volatility and semi-volatile organic compounds from domestic fuels used in Delhi, India
Source: Copernicus journal article supplement (doi:10.5194/acp-2020-860), 2020-08-25
Supplement: Supplementary file [file acp-2020-860-AC1-supplement.pdf]

We would like to thank the reviewers for their positive and constructive reviews of this paper. We address the specific points of each reviewer below. Reviewer comments in blue, author response in black, text added or amended in paper in purple.

#### Reviewer comment 1

Stewart et al present an extremely detailed analysis of emissions of lower-volatility vapours (l/SVOCs) and particulate matter from domestic fuel burning. They focused on fuels typically burned in India. One novel aspect of this study is the use of GCxGC to identify hundreds of individual species emitted from each fuel type.

Overall the paper is very well written and easy to follow. The description of the methods, in particular, is very detailed and shows the high level of specificity in the measurements and the extensive QA/QC. The paper is a little bit tough to follow because the section (and sub-section) headers all have the same style and font. This makes it hard to determine the organization of the manuscript (e.g., there are several sub-sections to C1 ACPD Interactive comment Printer-friendly version Discussion paper the Methods, but the headers are indistinguishable from the following Results section). Consider numbering the sections.

We thank the reviewer for their suggestion and all sections are now numbered.

This paper presents a potentially valuable dataset containing measurements of hundreds of species. However, only the emission factors for PAHs are listed in detail in Table 1 of the SI. I think it would be beneficial for the authors to share the full suite of measured compounds, either in the SI or in an online repository, so that data can be used by other researchers in the future.

We have added this to the SI.

One potential weakness is that there is only one sample for most of the fuels tested (Table 1). The authors should acknowledge that there can be significant burn-to-burn differences in emissions.

This is indeed a limitation and is now acknowledged in the main text.

Variability in emission of particulate-phase PAHs in our study compared to literature was likely to be highly influenced by the efficiency of combustion of different fuel types. This may also

be explained by measuring only once for many of the fuel types, due to significant burn-to-burn differences in emissions.

I'm not certain that Table 2 should be in the main text. This table seems to be part of the QA/QC, and it seems to me that it would be better placed in the SI.

This table is now in the SI.

Figure 5 is hard to interpret. The symbols are very small (as is the legend), and as the authors note in the text, there are a lot of species shown. Since the text focuses on the PAHs, it might help readability to put this version of the figure in the SI and only show the PAHs (with larger symbols) in the main text.

Figure 5 is now in the SI and this figure has been replaced with a lighter version which just focusses on PAHs as suggested. This is much clearer and highlights the regions of the chromatogram dominated by species in each phase.

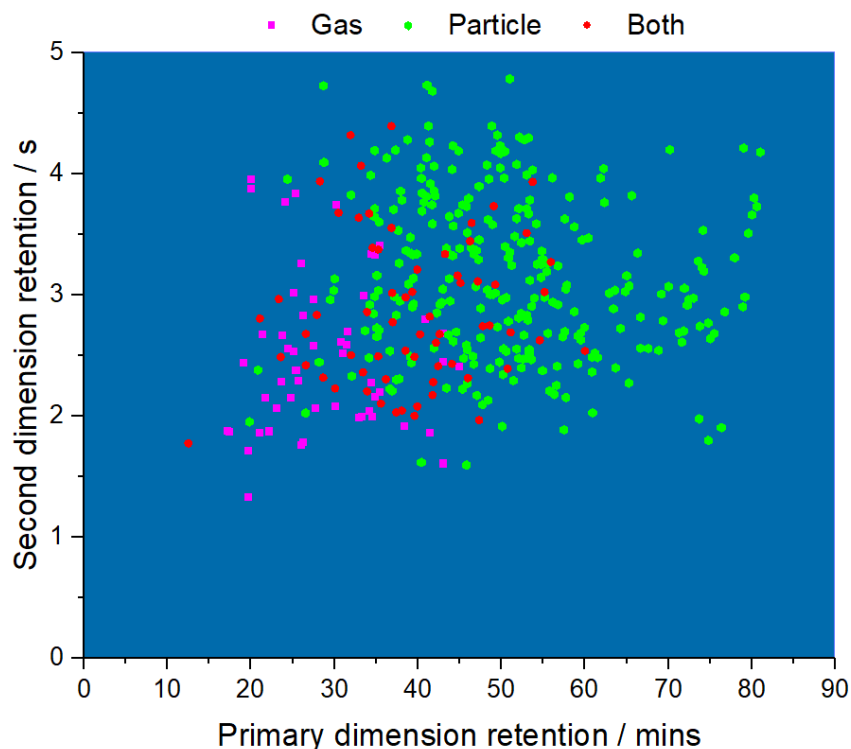

Figure 1. Gas and particle phase composition of PAH emissions from burning cow dung cake.

Figure 7 and line 548-550 suggest that more of the mass could be speciated with new instruments. However Figure 7 focuses on peaks that can be positively matched with

something in one of the standards. Is it possible to infer composition based on the mass spectra of the unidentified peaks?

This is tackled in the companion paper acp 2020-892, which may not have been visible at the point of submission of this manuscript. High levels of total speciation are achieved (>90 %) using other instruments. We will direct readers to acp 2020-892 in the text.

Quantitative emission factors of VOCs from the combustion of solid fuels characteristic to Delhi are provided in a companion publication (Stewart et al., 2020a).

Grammatical comments: Line 152 and 153 - it seems like "samples" in the former line mean the sampled media (filters and SPE), and in the latter it means the fuels. Please clarify.

This has been clarified throughout, with samples referring to the organic components collected and analysed and fuel types referring to the biofuels collected and burnt.

Line 195 - define EtOAc Line 347 uses NVOC to indicate "non-volatile", but the paragraph starting at line 389 seems to use NVOC to indicate "nitrogen-containing." Please clarify.

EtOAc and MeOH are now defined in the text as requested.

The reviewer makes a valid point about the use of NVOC as "non-volatile" and therefore the nitrogen containing VOCs are no longer abbreviated as NVOCs.

#### Reviewer comment 2

Stewart et al. have developed a gas-chromatography-based analytical technique to speciate and quantify semi-volatile and intermediate volatility organic compounds (S/IVOCs) and applied this technique to measure emissions of S/IVOCs from domestic fuels used in Delhi, India. S/IVOCs are important precursors to ozone and aerosol formation in the atmosphere and there is need to develop robust analytical techniques to speciate and quantify their emissions. Biomass burning is an important source of global air pollution and the type of biomass burning studied here (i.e., biofuel combustion) is a particularly understudied emission source. Hence, the work described in the manuscript is well motivated. I should also commend the authors for a well written manuscript that provides all the necessary details to comment on the methods and the interpretation of the results. The analytical method development was well designed and the application was very well described, although I

should note that I am not trained as an analytical chemist. This should serve as a useful resource for researchers doing similar work in the atmospheric community. The primary results of speciation and quantification are well described too but, given the large dataset that is being analyzed, only a small fraction of the data are actually presented. I recommend the publication of this study in Atmospheric Chemistry and Physics after the authors have had a chance to respond to my, mostly big-picture and minor, comments.

Big-picture comments: 1. The introduction seems too generic and long at the moment and needs to be realigned to describe the state-of-the-science and gaps as it relates to the key findings from this work. For instance, lines 53-68 discuss S/IVOC emissions generally but don't focus on those emissions from biomass burning.

The introduction has been rewritten, and shortened, as suggested with the new structure: (1) general introduction to organic emissions from biomass burning, (2) state-of-the-art studies focussed on SOA formation from biomass burning, (3) state-of-the-art studies focussed on GCxGC analysis of biomass burning emissions and the research gap to be filled, (4) state-of-the-art studies focussed on detailed I/SVOC analyses of south Asian fuels, (5) research gaps to be filled with this work in terms of analytical procedures and poorly understood, but widely used, Asian fuels.

General discussion of historical biomass burning I/SVOC measurement procedures, application of GCxGC to other source sectors and Indian air quality has now been removed. It now reads:

Biomass burning is one of the most important global sources of trace gases and particles to the atmosphere (Simoneit, 2002; Chen et al., 2017; Andreae, 2019), with residential solid fuel combustion and wildfires emitting significant quantities of organic matter (Streets et al., 2003; Barboni et al., 2010; Chen et al., 2017; Liu et al., 2017; Kiely et al., 2019). Emissions of volatile organic compounds (VOCs) and particulate matter (PM) from biomass burning are of interest due to their detrimental impact on air quality. VOCs react to form ozone and secondary organic aerosol (SOA). Intermediate-volatility and semi-volatile organic compounds (I/SVOCs) are also a significant emission from biomass burning (Stockwell et al., 2015; Koss et al., 2018). I/SVOCs are an important class of air pollutant due to their

contribution to aerosol formation (Bruns et al., 2016; Lu et al., 2018). I/SVOC emissions are poorly, if at all, represented in regional inventories and chemical transport models. Consequently, their impact to air quality in developing regions, where solid fuel combustion is a dominant fuel source, is not well understood. Recent studies have shown that the inclusion of I/SVOCs leads to better agreement between modelled and measured values (Ots et al., 2016; Woody et al., 2016; Murphy et al., 2017; Jathar et al., 2017). Global I/SVOC emissions to the atmosphere from biomass burning were estimated to be  $\sim 54 \text{ Tg yr}^{-1}$  from 2005-2008 (Hodzic et al., 2016), with I/SVOCs contributing in the range 8-15.5  $\text{Tg yr}^{-1}$  to SOA (Cubison et al., 2011; Hodzic et al., 2016).

SOA formation from biomass burning emissions is poorly understood globally. Important factors include the formation of less volatile products from the oxidation of NMVOCs which partition into the aerosol phase, heterogeneous oxidation of aerosol phase organics as well as plume dilution followed by evaporation and further gas-phase oxidation (Lim et al., 2019). Ahern et al. (2019) showed that for burning of biomass needles, biogenic VOCs were the dominant class of SOA precursor. This study also found that for wiregrass, furans were the most important SOA precursor. Bruns et al. (2016) showed that SOA formation from combustion of beech fuel wood was dominated by 22 compounds, with phenol, naphthalene and benzene contributing up to 80 % of the observed SOA. SOA formation from biomass burning has been shown to be significant in laboratory studies, with SOA yields from the burning of western U.S. fuels reported to be  $24 \pm 4 \%$  after 6 h and  $56 \pm 9 \%$  after 4 d (Lim et al., 2019). However, the effect of atmospheric aging on I/SVOCs still remains poorly understood (Liu et al., 2017; Decker et al., 2019; Sengupta et al., 2020).

Better understanding of the quantity and composition of I/SVOCs from biomass burning is needed to evaluate their impact on the atmosphere. This is a difficult analytical task, not well suited to conventional analysis with gas chromatography coupled to mass spectrometry (GC-MS). The reason for this is because of the exponential growth of potential isomers with carbon number, which results in a large number of coeluting peaks (Goldstein and Galbally, 2007). The high resolution of two-dimensional gas chromatography (GC $\times$ GC) has been demonstrated as an ideal technique to overcome this issue when analysing complex organic samples in both gas (Lewis et al., 2000; Stewart et al., 2020b) and particle phases (Hamilton et al., 2004; Lyu et al., 2019). The application of GC $\times$ GC to biomass burning emissions has shown hundreds of

gaseous I/SVOCs using adsorption-thermal desorption cartridges (Hatch et al., 2015) or solid phase extraction (SPE) disks (Hatch et al., 2018). GCxGC has also been used to analyse the particle phase from samples collected onto PTFE or quartz filters (Hatch et al., 2018; Jen et al., 2019), with the latter study quantifying 149 organic compounds which accounted for 4-37 % of the total mass of organic carbon. The process used by Hatch et al. (2018) demonstrated high recoveries of non-polar species from PTFE filters, with lower recoveries from SPE disks. This study highlighted the need for further evaluation of samples collected onto PTFE filters and SPE disks, ideally improving the method to remove undesirable steps such as trimethylsilylation derivatisation, the use of pyridine and centrifuging which led to high evaporative losses. The need to develop improved sampling and measurement techniques for I/SVOCs has also been highlighted. This is because these species often do not transmit quantitatively through the inlet and tubing when measured using online gas-phase techniques (Pagonis et al., 2017).

Residential combustion, agricultural crop residue burning and open municipal solid waste burning in the developing world are large, poorly characterised pollution sources with the potential to have a significant impact on local and regional air quality, impacting human health (Venkataraman et al., 2005; Jain et al., 2014; Wiedinmyer et al., 2014). Hazardous indoor air pollution from combustion of solid fuels has been shown to be the most important factor from a range of 67 environmental and lifestyle risk factors causing disease in South Asia (Lim et al., 2012). Despite this, nearly 76 % of rural Indian households depend on solid biomass for their cooking needs (Gordon et al., 2018), using biofuels such as fuel wood, cow dung cake and crop residue. Combustion often takes place indoors, without efficient emission controls, which significantly increases the mean household concentration of pollutants, particularly particulate matter with a diameter less than 2.5  $\mu\text{m}$  ( $\text{PM}_{2.5}$ ). The health effects from this are significant, with an estimated 3.8 million premature deaths globally due to inefficient indoor combustion from cooking (WHO, 2018).

Few detailed studies have been conducted examining the composition of I/SVOC emissions from solid-fuel combustion sources from South Asia. Sheesley et al. (2003) used solvent extraction followed by GC-MS to produce emission factors and examine molecular markers from combustion of coconut leaves, rice straw, cow dung cake, biomass briquettes and jackfruit branches collected from Bangladesh. A more recent study extracted  $\text{PM}_{2.5}$  samples

followed by analysis with GC-MS of samples collected from motorcycles, diesel- and gasoline-generators, agricultural pumps, municipal solid waste burning, cooking fires using fuel wood and cow dung cake, crop residue burning and brick kilns in Nepal (Jayarathne et al., 2018). Lack of knowledge regarding major pollution sources hinders our ability to predict air quality, but also the development of effective mitigation strategies for air pollution which leads to health impacts ranging from respiratory illness to premature death (Brunekreef and Holgate, 2002). This results in many people living with high levels of air pollution (Lelieveld et al., 2015; Cohen et al., 2005) and 13 Indian cities ranking amongst the top 20 cities in the world with the highest levels of ambient PM<sub>2.5</sub> pollution, based on available data (Gordon et al., 2018).

In this study we develop a more efficient extraction step for the SPE/PTFE technique developed by Hatch et al. (2018), using accelerated solvent extraction into ethyl acetate, which showed high recoveries of non-polar I/SVOCs. Domestic fuels characteristic to Northern India were gathered and organic I/SVOC samples collected onto SPE disks and PTFE filters from controlled laboratory combustion experiments of a variety of fuel woods, cow dung cakes, municipal solid waste samples, crop residues, charcoal and LPG. The samples were extracted using this new technique and analysed with GC×GC coupled to time-of-flight mass spectrometry (GC×GC-ToF-MS). Molecular markers were examined from different fuels and the limitations for quantification of the extremely complex samples were examined.

Text from lines 69 to 107 could be condensed into a few sentences. Earlier work relevant to this paper seems to be mentioned in lines 108 to 145 and needs to be highlighted, front and center.

This has been rectified through the new introduction paragraph.

Another point that could be highlighted is that S/IVOC emissions are poorly, if at all, represented in emissions inventories and chemical transport models and their impacts on atmospheric chemistry and air quality are uncertain (with particular relevance to regions where this and similar fuel use is dominant, e.g., Asia).

This is now highlighted in the first paragraph of the introduction as:

I/SVOC emissions are poorly, if at all, represented in regional inventories and chemical transport models.

2. Given the large variability seen in biomass burning emissions, say relative to internal combustion engines, the authors should comment on the single experiments done for most of the fuels. This could be done by analyzing the experiment-to-experiment variability for the fuels where multiple experiments were done (i.e., cow dung cake, waste), as well as through a review of similar literature.

This is a great comment. We now acknowledge this in the text.

Figure 8 shows that there was large sample to sample variability in emission factors for different fuel wood samples, for which only 1 sample was taken. For this reason, emission factors have been generalised for use in budget estimates to the type of fuel. Mean emission factors are provided for measurements from samples of 17 fuel woods, 3 crop residues, 3 cow dung cakes and 3 different collections of municipal solid waste. Despite this, for LPG and charcoal samples only 1 sample was measured, and this significantly increases the uncertainty in the PAH emission factors from these fuel sources.

We also look at this in some more detail in the companion paper, aCP 2020-892, but in a more quantitative manner, presenting total non-methane volatile organic compound emission factors and looking at over 50 different combustion experiments of fuelwoods. This is better presented in this companion paper as there is a larger dataset of emissions.

In addition, they should also comment on the differences in combustion encountered in their setup versus a real-world application. For example, most municipal solid waste is probably burned in a high-temperature incinerator where the combustion chemistry might be very different than the combustion simulated in this work. I do understand that 'backyard' low-temperature MSW fires are a major concern in India, including in Delhi.

This is now acknowledged in the text as shown below.

This study was conducted under controlled laboratory conditions. For some sample types, such as municipal solid waste, the laboratory measurement may not be entirely reflective of real-world conditions. Municipal solid waste combustion may occur under both flaming and smouldering conditions at landfill sites and in backyards, as well as in high-temperature



incinerators in more developed countries. All of these are likely to have quite different combustion chemistry, and consequently lead to varying levels of emission.

3. I commend the authors on putting together this fantastic dataset of speciation and emission factors and I am fairly certain that this will serve as a comprehensive resource for years to come (from studying exposure to toxic pollutants to developing accurate emissions inventories for air quality modeling). [This must be an oversight but I did not see a 'data availability' section that describes how and where the data will be archived for others to use]. However, the manuscript seems to present only a 'snapshot' of the dataset, with a mix of higher-level observations and depth for only a subset of speciated organic compounds (e.g., PAHs). Correct me if I am wrong but there is so much more to the dataset than what is presented. If that is indeed the case, what I would have liked to see is a structured vision for how the data plans to be analyzed further (e.g., detailed source profiles, molecular markers for source identification, volatility distributions) and what open, pressing questions would this dataset help answer in the long run?

We have added a table of peaks measured on both SPE disks and PTFE filters to the SI. We also now have the companion paper *acp* 2020-892, which gives speciated emission factors from these burns and provides quantitative emission factors in the supplementary information. We will provide a short reference within this paper to *acp* 2020-892 to emphasise this.

We have also submitted a paper to another journal which provides comprehensive organic emission profiles from 5 different instruments. This analyses the volatility distribution of organic emissions from C<sub>2</sub>-C<sub>40</sub>. The paper also provides additional insight into the new datasets by looking at the secondary organic aerosol production potential, OH reactivity and toxicity of emissions from domestic fuels in Delhi, India.

In addition, the dataset (provided in *acp* 2020-892) will also be used to better constrain NMVOC emissions through formation of local and regional emission inventories.

Minor comments: 1. Line 228: Explain what 'NIST library hit was >800' means.

This has now been explained in the text.

Peaks were assigned through comparison of retention times with known standards and comparison with the National Institute of Standards and Technology (NIST) mass spectral library. Peaks with no genuine standard available were tentatively identified if the NIST library similarity was > 700. This provides an indication of how similar the mass spectra obtained was to the database mass spectra for the peak, with more details given in Stein, (2011). Peaks with a hit > 900 reflect an excellent match, 800-900 a good match and 700-800 a fair match (Stein, 2011). The uncertainty in this approach has been shown to be low for peaks of hits > 800, with the probability of incorrect identification being around 30 % for hits between 800-900 and 14 % for matches above 900 (Worton et al., 2017).

2. Line 471-485: Clarifying questions. Is the low fraction of the speciation of the organic aerosol limited to not finding a match in the NIST or does it highlight a problem with the analytical method? In addition, how sensitive is the fraction speciated to the use of the filter media, i.e., better with PTFE versus quartz?

The low fraction of speciation of organic aerosol is due to lack of genuine standards available to develop detector-response curves for the mass spectrometer. Many peaks have a mass spectral database hit, but this does not impact the percentage identified here.

Percentage identification should not be influenced by the filter sampling media. This is low in complex samples due to lack of genuine standards to allow quantitative detector-response curves for individual analytes to be developed. The accelerated solvent extraction method used here may miss some of the most polar water soluble species as they are not soluble in EtOAc.

3. The composition section could benefit from findings from some recent publications that have studied SOA from biomass burning emissions or precursors, e.g., He et al. (ESPI, 2020) – alkylfuran mixture, Joo et al., (ESC, 2019) – 3-methylfuran, Ahern et al. (JGR, 2019), Akherati et al. (ES&T, 2020), and Lim et al. (ACP, 2019) – biomass burning SOA in laboratory experiments with an emphasis on understanding phenolic, furanic, and monoterpene VOC contributions to SOA.

This paper now includes references to the above papers which focus on SOA formation from biomass burning emissions. Some have been included in the adjusted introduction and some in the composition section.

## Introduction:

Ahern et al. (2019) showed that for burning of biomass needles, biogenic VOCs were the dominant class of SOA precursor.

SOA formation from biomass burning has been shown to be significant in laboratory studies, with SOA yields from the burning of western U.S. fuels reported to be  $24 \pm 4$  % after 6 h and  $56 \pm 9$  % after 4 d (Lim et al., 2019).

## Main body:

SOA formation from furanic species remains poorly understood, with a recent study showing an SOA yield of 1.6-2.4 % during the oxidation of 3-methylfuran with the nitrate radical (Joo et al., 2019).

A recent study found that, oxygenated aromatic compounds, which included phenols and methoxyphenols, were responsible for just under 60 % of the SOA formed from western U.S. fuels (Akherati et al., 2020).

4. Figure 7: Was total organic mass in the gas- and particle phase measured another way, e.g., FID-gas, Sunset OC/EC-particle, to get mass closure?

Organic mass in the gas phase was measured with two separate gas chromatographs and a proton-transfer reaction mass spectrometer, with the data treated in the companion paper acp 2020-892. No direct-FID measurements of total hydrocarbon were attempted, in part due to the difficulty of dealing with the change in sensitivity of the FID for hydrocarbons and OVOCs which constitute a large fraction of the gas phase VOCs. Organic mass balance is treated in a subsequent publication which maps emissions onto a volatility-basis dataset and has been submitted for review elsewhere. However, OC/EC was not measured on these PM samples due to the small sample size.

5. Figure 8: Mention sample size for each fuel. Specify measurement uncertainty when  $n=1$ . Combine measurement uncertainty and experiment-to-experiment variability when  $n>1$ .

This point has been addressed in major point 2.

Table 1 shows the sample size for each fuel. Figure 8 shows that there was large sample to sample variability in emission factors for different wood samples, for which only 1 sample was

taken. For this reason, emission factors have been generalised for use in budget estimates to the type of fuel. Mean emission factors have been provided for measurements from samples of 17 fuel woods, 3 crop residues, 3 cow dung cakes and 3 different collections of municipal solid waste. The mean values and standard deviations of measured emission factors are as follows: fuelwood ( $247 \pm 214 \text{ mg kg}^{-1}$ ), crop residue ( $747 \pm 518 \text{ mg kg}^{-1}$ ), MSW ( $1022 \pm 340 \text{ mg kg}^{-1}$ ) and cow dung cake ( $615 \pm 112 \text{ mg kg}^{-1}$ ). Despite this, for LPG and charcoal samples only 1 sample was measured, and this significantly increases the uncertainty in the PAH emission factors from these fuel sources. Experiment to experiment variability is provided in the companion paper acp 2020-892.

6. Figure 9: Was the gas/particle partitioning of PAHs analyzed further? Seems like an ideal dataset to study absorptive partitioning.

This has not been analysed as part of this work. A subsequent publication will provide a volatility-basis dataset of emissions from the fuel types studied here. It should be possible to dilute this to real-world dilutions, particulate matter concentrations and temperatures to better understand, and represent, the gas/particle phase partitioning of emissions from biomass burning.

7. Lines 631- 632: Why were certain samples fully speciated and others not very much? Was this relationship examined further with respect to its sensitivity to fuel, total organic mass captured on filter/disc, other variables?

Certain fuels were not fully speciated due to the low quantity of organic matter released and the availability of standards to quantify these. For extremely complex samples, genuine standards were not available to develop quantitative mass-spectrometer response curves to these peaks and resulted in low levels of total quantification. Future suggestions are given in the text of splitting the eluent between the mass spectrometer and a flame ionisation detector to provide much better semi quantification.

## References

Akherati, A., He, Y., Coggon, M. M., Koss, A. R., Hodshire, A. L., Sekimoto, K., Warneke, C., de Gouw, J., Yee, L., Seinfeld, J. H., Onasch, T. B., Herndon, S. C., Knighton, W. B., Cappa, C. D., Kleeman, M. J., Lim, C. Y., Kroll, J. H., Pierce, J. R., and Jathar, S. H.: Oxygenated Aromatic

Compounds are Important Precursors of Secondary Organic Aerosol in Biomass-Burning Emissions, *Environmental Science & Technology*, 54, 8568-8579, [10.1021/acs.est.0c01345](https://doi.org/10.1021/acs.est.0c01345), 2020.

Andreae, M. O.: Emission of trace gases and aerosols from biomass burning – an updated assessment, *Atmos. Chem. Phys.*, 19, 8523-8546, [10.5194/acp-19-8523-2019](https://doi.org/10.5194/acp-19-8523-2019), 2019.

Barboni, T., Cannac, M., Pasqualini, V., Simeoni, A., Leoni, E., and Chiaramonti, N.: Volatile and semi-volatile organic compounds in smoke exposure of firefighters during prescribed burning in the Mediterranean region, *International Journal of Wildland Fire*, 19, [10.1071/WF08121](https://doi.org/10.1071/WF08121), 2010.

Brunekreef, B., and Holgate, S. T.: Air pollution and health, *The Lancet*, 360, 1233-1242, [https://doi.org/10.1016/S0140-6736\(02\)11274-8](https://doi.org/10.1016/S0140-6736(02)11274-8), 2002.

Bruns, E. A., El Haddad, I., Slowik, J. G., Kilic, D., Klein, F., Baltensperger, U., and Prévôt, A. S. H.: Identification of significant precursor gases of secondary organic aerosols from residential wood combustion, *Scientific Reports*, 6, 27881, [10.1038/srep27881](https://doi.org/10.1038/srep27881), 2016.

Chen, J., Li, C., Ristovski, Z., Milic, A., Gu, Y., Islam, M. S., Wang, S., Hao, J., Zhang, H., He, C., Guo, H., Fu, H., Miljevic, B., Morawska, L., Thai, P., Lam, Y. F., Pereira, G., Ding, A., Huang, X., and Dumka, U. C.: A review of biomass burning: Emissions and impacts on air quality, health and climate in China, *Science of The Total Environment*, 579, 1000-1034, <https://doi.org/10.1016/j.scitotenv.2016.11.025>, 2017.

Cohen, A. J., Ross Anderson, H., Ostro, B., Pandey, K. D., Krzyzanowski, M., Künzli, N., Gutschmidt, K., Pope, A., Romieu, I., Samet, J. M., and Smith, K.: The Global Burden of Disease Due to Outdoor Air Pollution, *Journal of Toxicology and Environmental Health, Part A*, 68, 1301-1307, [10.1080/15287390590936166](https://doi.org/10.1080/15287390590936166), 2005.

Cubison, M. J., Ortega, A. M., Hayes, P. L., Farmer, D. K., Day, D., Lechner, M. J., Brune, W. H., Apel, E., Diskin, G. S., Fisher, J. A., Fuelberg, H. E., Hecobian, A., Knapp, D. J., Mikoviny, T., Riemer, D., Sachse, G. W., Sessions, W., Weber, R. J., Weinheimer, A. J., Wisthaler, A., and Jimenez, J. L.: Effects of aging on organic aerosol from open biomass burning smoke in aircraft and laboratory studies, *Atmos. Chem. Phys.*, 11, 12049-12064, [10.5194/acp-11-12049-2011](https://doi.org/10.5194/acp-11-12049-2011), 2011.

Decker, Z. C. J., Zarzana, K. J., Coggon, M., Min, K.-E., Pollack, I., Ryerson, T. B., Peischl, J., Edwards, P., Dubé, W. P., Markovic, M. Z., Roberts, J. M., Veres, P. R., Graus, M., Warneke, C., de Gouw, J., Hatch, L. E., Barsanti, K. C., and Brown, S. S.: Nighttime Chemical Transformation

in Biomass Burning Plumes: A Box Model Analysis Initialized with Aircraft Observations, *Environmental Science & Technology*, 53, 2529-2538, 10.1021/acs.est.8b05359, 2019.

Goldstein, A. H., and Galbally, I. E.: Known and Unexplored Organic Constituents in the Earth's Atmosphere, *Environmental Science & Technology*, 41, 1514-1521, 10.1021/es072476p, 2007.

Gordon, T., Balakrishnan, K., Dey, S., Rajagopalan, S., Thornburg, J., Thurston, G., Agrawal, A., Collman, G., Guleria, R., Limaye, S., Salvi, S., Kilaru, V., and Nadadur, S.: Air pollution health research priorities for India: Perspectives of the Indo-US Communities of Researchers, *Environment International*, 119, 100-108, 10.1016/j.envint.2018.06.013, 2018.

Hamilton, J. F., Webb, P. J., Lewis, A. C., Hopkins, J. R., Smith, S., and Davy, P.: Partially oxidised organic components in urban aerosol using GCXGC-TOF/MS, *Atmos. Chem. Phys.*, 4, 1279-1290, 10.5194/acp-4-1279-2004, 2004.

Hatch, L. E., Luo, W., Pankow, J. F., Yokelson, R. J., Stockwell, C. E., and Barsanti, K. C.: Identification and quantification of gaseous organic compounds emitted from biomass burning using two-dimensional gas chromatography–time-of-flight mass spectrometry, *Atmos. Chem. Phys.*, 15, 1865-1899, 10.5194/acp-15-1865-2015, 2015.

Hatch, L. E., Rivas-Ubach, A., Jen, C. N., Lipton, M., Goldstein, A. H., and Barsanti, K. C.: Measurements of I/SVOCs in biomass-burning smoke using solid-phase extraction disks and two-dimensional gas chromatography, *Atmos. Chem. Phys.*, 18, 17801-17817, 10.5194/acp-18-17801-2018, 2018.

Hodzic, A., Kasibhatla, P. S., Jo, D. S., Cappa, C. D., Jimenez, J. L., Madronich, S., and Park, R. J.: Rethinking the global secondary organic aerosol (SOA) budget: stronger production, faster removal, shorter lifetime, *Atmos. Chem. Phys.*, 16, 7917-7941, 10.5194/acp-16-7917-2016, 2016.

Jain, N., Bhatia, A., and Pathak, H.: Emission of Air Pollutants from Crop Residue Burning in India, *Aerosol Air Qual. Res.*, 14, 422-430, 10.4209/aaqr.2013.01.0031, 2014.

Jathar, S. H., Woody, M., Pye, H. O. T., Baker, K. R., and Robinson, A. L.: Chemical transport model simulations of organic aerosol in southern California: model evaluation and gasoline and diesel source contributions, *Atmos. Chem. Phys.*, 17, 4305-4318, 10.5194/acp-17-4305-2017, 2017.

Jayarathne, T., Stockwell, C. E., Bhave, P. V., Praveen, P. S., Rathnayake, C. M., Islam, M. R., Panday, A. K., Adhikari, S., Maharjan, R., Goetz, J. D., DeCarlo, P. F., Saikawa, E., Yokelson, R.

J., and Stone, E. A.: Nepal Ambient Monitoring and Source Testing Experiment (NAMaSTE): emissions of particulate matter from wood- and dung-fueled cooking fires, garbage and crop residue burning, brick kilns, and other sources, *Atmos. Chem. Phys.*, **18**, 2259-2286, 10.5194/acp-18-2259-2018, 2018.

Jen, C. N., Hatch, L. E., Selimovic, V., Yokelson, R. J., Weber, R., Fernandez, A. E., Kreisberg, N. M., Barsanti, K. C., and Goldstein, A. H.: Speciated and total emission factors of particulate organics from burning western US wildland fuels and their dependence on combustion efficiency, *Atmos. Chem. Phys.*, **19**, 1013-1026, 10.5194/acp-19-1013-2019, 2019.

Joo, T., Rivera-Rios, J. C., Takeuchi, M., Alvarado, M. J., and Ng, N. L.: Secondary Organic Aerosol Formation from Reaction of 3-Methylfuran with Nitrate Radicals, *ACS Earth and Space Chemistry*, **3**, 922-934, 10.1021/acsearthspacechem.9b00068, 2019.

Kiely, L., Spracklen, D. V., Wiedinmyer, C., Conibear, L., Reddington, C. L., Archer-Nicholls, S., Lowe, D., Arnold, S. R., Knote, C., Khan, M. F., Latif, M. T., Kuwata, M., Budisulistiorini, S. H., and Syaufina, L.: New estimate of particulate emissions from Indonesian peat fires in 2015, *Atmos. Chem. Phys.*, **19**, 11105-11121, 10.5194/acp-19-11105-2019, 2019.

Koss, A. R., Sekimoto, K., Gilman, J. B., Selimovic, V., Coggon, M. M., Zarzana, K. J., Yuan, B., Lerner, B. M., Brown, S. S., Jimenez, J. L., Krechmer, J., Roberts, J. M., Warneke, C., Yokelson, R. J., and de Gouw, J.: Non-methane organic gas emissions from biomass burning: identification, quantification, and emission factors from PTR-ToF during the FIREX 2016 laboratory experiment, *Atmos. Chem. Phys.*, **18**, 3299-3319, 10.5194/acp-18-3299-2018, 2018.

Lelieveld, J., Evans, J. S., Fnais, M., Giannadaki, D., and Pozzer, A.: The contribution of outdoor air pollution sources to premature mortality on a global scale, *Nature*, **525**, 367, 10.1038/nature15371, 2015.

Lewis, A. C., Carslaw, N., Marriott, P. J., Kinghorn, R. M., Morrison, P., Lee, A. L., Bartle, K. D., and Pilling, M. J.: A larger pool of ozone-forming carbon compounds in urban atmospheres, *Nature*, **405**, 778-781, 10.1038/35015540, 2000.

Lim, C. Y., Hagan, D. H., Coggon, M. M., Koss, A. R., Sekimoto, K., de Gouw, J., Warneke, C., Cappa, C. D., and Kroll, J. H.: Secondary organic aerosol formation from the laboratory oxidation of biomass burning emissions, *Atmos. Chem. Phys.*, **19**, 12797-12809, 10.5194/acp-19-12797-2019, 2019.

Lim, S. S., Vos, T., Flaxman, A. D., Danaei, G., Shibuya, K., Adair-Rohani, H., AlMazroa, M. A., Amann, M., Anderson, H. R., Andrews, K. G., Aryee, M., Atkinson, C., Bacchus, L. J., Bahalim, A. N., Balakrishnan, K., Balmes, J., Barker-Collo, S., Baxter, A., Bell, M. L., Blore, J. D., Blyth, F., Bonner, C., Borges, G., Bourne, R., Boussinesq, M., Brauer, M., Brooks, P., Bruce, N. G., Brunekreef, B., Bryan-Hancock, C., Bucello, C., Buchbinder, R., Bull, F., Burnett, R. T., Byers, T. E., Calabria, B., Carapetis, J., Carnahan, E., Chafe, Z., Charlson, F., Chen, H., Chen, J. S., Cheng, A. T.-A., Child, J. C., Cohen, A., Colson, K. E., Cowie, B. C., Darby, S., Darling, S., Davis, A., Degenhardt, L., Dentener, F., Des Jarlais, D. C., Devries, K., Dherani, M., Ding, E. L., Dorsey, E. R., Driscoll, T., Edmond, K., Ali, S. E., Engell, R. E., Erwin, P. J., Fahimi, S., Falder, G., Farzadfar, F., Ferrari, A., Finucane, M. M., Flaxman, S., Fowkes, F. G. R., Freedman, G., Freeman, M. K., Gakidou, E., Ghosh, S., Giovannucci, E., Gmel, G., Graham, K., Grainger, R., Grant, B., Gunnell, D., Gutierrez, H. R., Hall, W., Hoek, H. W., Hogan, A., Hosgood, H. D., Hoy, D., Hu, H., Hubbell, B. J., Hutchings, S. J., Ibeanusi, S. E., Jacklyn, G. L., Jasrasaria, R., Jonas, J. B., Kan, H., Kanis, J. A., Kassebaum, N., Kawakami, N., Khang, Y.-H., Khatibzadeh, S., Khoo, J.-P., Kok, C., Laden, F., Lalloo, R., Lan, Q., Lathlean, T., Leasher, J. L., Leigh, J., Li, Y., Lin, J. K., Lipshultz, S. E., London, S., Lozano, R., Lu, Y., Mak, J., Malekzadeh, R., Mallinger, L., Marcenes, W., March, L., Marks, R., Martin, R., McGale, P., McGrath, J., Mehta, S., Memish, Z. A., Mensah, G. A., Merriman, T. R., Micha, R., Michaud, C., Mishra, V., Hanafiah, K. M., Mokdad, A. A., Morawska, L., Mozaffarian, D., Murphy, T., Naghavi, M., Neal, B., Nelson, P. K., Nolla, J. M., Norman, R., Olives, C., Omer, S. B., Orchard, J., Osborne, R., Ostro, B., Page, A., Pandey, K. D., Parry, C. D. H., Passmore, E., Patra, J., Pearce, N., Pelizzari, P. M., Petzold, M., Phillips, M. R., Pope, D., Pope, C. A., Powles, J., Rao, M., Razavi, H., Rehfuss, E. A., Rehm, J. T., Ritz, B., Rivara, F. P., Roberts, T., Robinson, C., Rodriguez-Portales, J. A., Romieu, I., Room, R., Rosenfeld, L. C., Roy, A., Rushton, L., Salomon, J. A., Sampson, U., Sanchez-Riera, L., Sanman, E., Sapkota, A., Seedat, S., Shi, P., Shield, K., Shivakoti, R., Singh, G. M., Sleet, D. A., Smith, E., Smith, K. R., Stapelberg, N. J. C., Steenland, K., Stöckl, H., Stovner, L. J., Straif, K., Straney, L., Thurston, G. D., Tran, J. H., Van Dingenen, R., van Donkelaar, A., Veerman, J. L., Vijayakumar, L., Weintraub, R., Weissman, M. M., White, R. A., Whiteford, H., Wiersma, S. T., Wilkinson, J. D., Williams, H. C., Williams, W., Wilson, N., Woolf, A. D., Yip, P., Zielinski, J. M., Lopez, A. D., Murray, C. J. L., and Ezzati, M.: A comparative risk assessment of burden of disease and injury attributable to 67 risk factors and risk factor clusters in 21 regions, 1990–2010: a systematic analysis for the



Global Burden of Disease Study 2010, *The Lancet*, 380, 2224-2260, [https://doi.org/10.1016/S0140-6736\(12\)61766-8](https://doi.org/10.1016/S0140-6736(12)61766-8), 2012.

Liu, X., Huey, L. G., Yokelson, R. J., Selimovic, V., Simpson, I. J., Müller, M., Jimenez, J. L., Campuzano-Jost, P., Beyersdorf, A. J., Blake, D. R., Butterfield, Z., Choi, Y., Crouse, J. D., Day, D. A., Diskin, G. S., Dubey, M. K., Fortner, E., Hanisco, T. F., Hu, W., King, L. E., Kleinman, L., Meinardi, S., Mikoviny, T., Onasch, T. B., Palm, B. B., Peischl, J., Pollack, I. B., Ryerson, T. B., Sachse, G. W., Sedlacek, A. J., Shilling, J. E., Springston, S., St. Clair, J. M., Tanner, D. J., Teng, A. P., Wennberg, P. O., Wisthaler, A., and Wolfe, G. M.: Airborne measurements of western U.S. wildfire emissions: Comparison with prescribed burning and air quality implications, *Journal of Geophysical Research: Atmospheres*, 122, 6108-6129, 10.1002/2016jd026315, 2017.

Lu, Q., Zhao, Y., and Robinson, A. L.: Comprehensive organic emission profiles for gasoline, diesel, and gas-turbine engines including intermediate and semi-volatile organic compound emissions, *Atmos. Chem. Phys.*, 18, 17637-17654, 10.5194/acp-18-17637-2018, 2018.

Lyu, R., Shi, Z., Alam, M. S., Wu, X., Liu, D., Vu, T. V., Stark, C., Xu, R., Fu, P., Feng, Y., and Harrison, R. M.: Alkanes and aliphatic carbonyl compounds in wintertime PM<sub>2.5</sub> in Beijing, China, *Atmospheric Environment*, 202, 244-255, <https://doi.org/10.1016/j.atmosenv.2019.01.023>, 2019.

Murphy, B. N., Woody, M. C., Jimenez, J. L., Carlton, A. M. G., Hayes, P. L., Liu, S., Ng, N. L., Russell, L. M., Setyan, A., Xu, L., Young, J., Zaveri, R. A., Zhang, Q., and Pye, H. O. T.: Semivolatile POA and parameterized total combustion SOA in CMAQv5.2: impacts on source strength and partitioning, *Atmos. Chem. Phys.*, 17, 11107-11133, 10.5194/acp-17-11107-2017, 2017.

Ots, R., Young, D. E., Vieno, M., Xu, L., Dunmore, R. E., Allan, J. D., Coe, H., Williams, L. R., Herndon, S. C., Ng, N. L., Hamilton, J. F., Bergström, R., Di Marco, C., Nemitz, E., Mackenzie, I. A., Kuenen, J. J. P., Green, D. C., Reis, S., and Heal, M. R.: Simulating secondary organic aerosol from missing diesel-related intermediate-volatility organic compound emissions during the Clean Air for London (ClearfLo) campaign, *Atmos. Chem. Phys.*, 16, 6453-6473, 10.5194/acp-16-6453-2016, 2016.

Pagonis, D., Krechmer, J. E., de Gouw, J., Jimenez, J. L., and Ziemann, P. J.: Effects of gas-wall partitioning in Teflon tubing and instrumentation on time-resolved measurements of gas-

phase organic compounds, *Atmos. Meas. Tech.*, 10, 4687-4696, 10.5194/amt-10-4687-2017, 2017.

Sengupta, D., Samburova, V., Bhattarai, C., Watts, A. C., Moosmüller, H., and Khlystov, A. Y.: Polar semi-volatile organic compounds in biomass burning emissions and their chemical transformations during aging in an oxidation flow reactor, *Atmos. Chem. Phys. Discuss.*, 2020, 1-50, 10.5194/acp-2019-1179, 2020.

Simoneit, B. R. T.: Biomass burning — a review of organic tracers for smoke from incomplete combustion, *Applied Geochemistry*, 17, 129-162, [https://doi.org/10.1016/S0883-2927\(01\)00061-0](https://doi.org/10.1016/S0883-2927(01)00061-0), 2002.

Stein, S. E.: National Institute and Standards and Technology (NIST) Mass Spectral Search Program. Version 2.0g., 2011.

Stewart, G. J., Acton, W. J. F., Nelson, B. S., Vaughan, A. R., Hopkins, J. R., Arya, R., Mondal, A., Jangirh, R., Ahlawat, S., Yadav, L., Dunmore, R. E., Yunus, S. S. M., Hewitt, C. N., Nemitz, E., Mullinger, N., Gadi, R., Rickard, A. R., Lee, J. D., Mandal, T. K., and Hamilton, J. F.: Emissions of non-methane volatile organic compounds from domestic fuels in Delhi, India, *Atmos. Chem. Phys. Discuss.*, <https://doi.org/10.5194/acp-2020-892>, 2020a.

Stewart, G. J., Nelson, B. S., Drysdale, W. S., Acton, W. J. F., Vaughan, A. R., Hopkins, J. R., Dunmore, R. E., Hewitt, C. N., Nemitz, E. G., Mullinger, N., Langford, B., Shivani, Villegas, E. R., Gadi, R., Rickard, A. R., Lee, J. D., and Hamilton, J. F.: Sources of non-methane hydrocarbons in surface air in Delhi, India, *Faraday Discussions* 10.1039/D0FD00087F, 2020b.

Stockwell, C. E., Veres, P. R., Williams, J., and Yokelson, R. J.: Characterization of biomass burning emissions from cooking fires, peat, crop residue, and other fuels with high-resolution proton-transfer-reaction time-of-flight mass spectrometry, *Atmos. Chem. Phys.*, 15, 845-865, 10.5194/acp-15-845-2015, 2015.

Streets, D. G., Bond, T. C., Carmichael, G. R., Fernandes, S. D., Fu, Q., He, D., Klimont, Z., Nelson, S. M., Tsai, N. Y., Wang, M. Q., Woo, J. H., and Yarber, K. F.: An inventory of gaseous and primary aerosol emissions in Asia in the year 2000, *Journal of Geophysical Research: Atmospheres*, 108, 10.1029/2002JD003093, 2003.

Venkataraman, C., Habib, G., Eiguren-Fernandez, A., Miguel, A. H., and Friedlander, S. K.: Residential biofuels in south Asia: Carbonaceous aerosol emissions and climate impacts, *Science*, 307, 1454-1456, 10.1126/science.1104359, 2005.

Household air pollution and health. Accessed 05 Aug 2020. Available from <https://www.who.int/news-room/fact-sheets/detail/household-air-pollution-and-health>, 2018.

Wiedinmyer, C., Yokelson, R. J., and Gullett, B. K.: Global Emissions of Trace Gases, Particulate Matter, and Hazardous Air Pollutants from Open Burning of Domestic Waste, *Environmental Science & Technology*, 48, 9523-9530, 10.1021/es502250z, 2014.

Woody, M. C., Baker, K. R., Hayes, P. L., Jimenez, J. L., Koo, B., and Pye, H. O. T.: Understanding sources of organic aerosol during CalNex-2010 using the CMAQ-VBS, *Atmos. Chem. Phys.*, 16, 4081-4100, 10.5194/acp-16-4081-2016, 2016.

Worton, D. R., Decker, M., Isaacman-VanWertz, G., Chan, A. W. H., Wilson, K. R., and Goldstein, A. H.: Improved molecular level identification of organic compounds using comprehensive two-dimensional chromatography, dual ionization energies and high resolution mass spectrometry, *Analyst*, 142, 2395-2403, 10.1039/c7an00625j, 2017.
